# Supplementary material for: Improvement of the Carbocatalytic Degradation of Pharmaceuticals in Water by the Use of Ultrasound Waves
Source: MDPI journal article supplement (doi:10.3390/w15203679), 2023-10-20
Supplement: s1 [file s1]

## SUPPLEMENTARY MATERIALS

# Improvement of the Carbocatalytic Degradation of Pharmaceuticals in Water by the Use of Ultrasound Waves

Carolina Quimbaya-Ñáñez <sup>1</sup>, Efraím A. Serna-Galvis <sup>1,2</sup>, Javier Silva-Agreto <sup>1</sup>,  
Inés García-Rubio <sup>3</sup>, Ricardo A. Torres-Palma <sup>1,\*</sup> and Yenny P. Ávila-Torres <sup>1,\*</sup>

<sup>1</sup> Grupo de Investigación en Remediación Ambiental y Biocatálisis (GIRAB), Instituto de Química, Facultad de Ciencias Exactas y Naturales, Universidad de Antioquia UdeA, Calle 70 No. 52-21, Medellín 050014, Colombia; carolina.quimbaya@udea.edu.co ([C.Q.-Ñ.](mailto:C.Q.-Ñ.)); efrain.serna@udea.edu.co (E.A.S.-G.); javier.silva@udea.edu.co (J.S.-A.)

<sup>2</sup> Catalizadores y Adsorbentes (CATALAD), Instituto de Química, Facultad de Ciencias Exactas y Naturales, Universidad de Antioquia UdeA, Calle 70 No. 52-21, Medellín 050014, Colombia

<sup>3</sup> Department of Condensed Matter Physics, Faculty of Sciences, University of Zaragoza, 50009 Zaragoza, Spain; [inesgr@unizar.es](mailto:inesgr@unizar.es)

\* Correspondence: [ricardo.torres@udea.edu.co](mailto:ricardo.torres@udea.edu.co) (R.A.T.-P.); [yenny.avila@udea.edu.co](mailto:yenny.avila@udea.edu.co) (Y.P.Á.-T.)

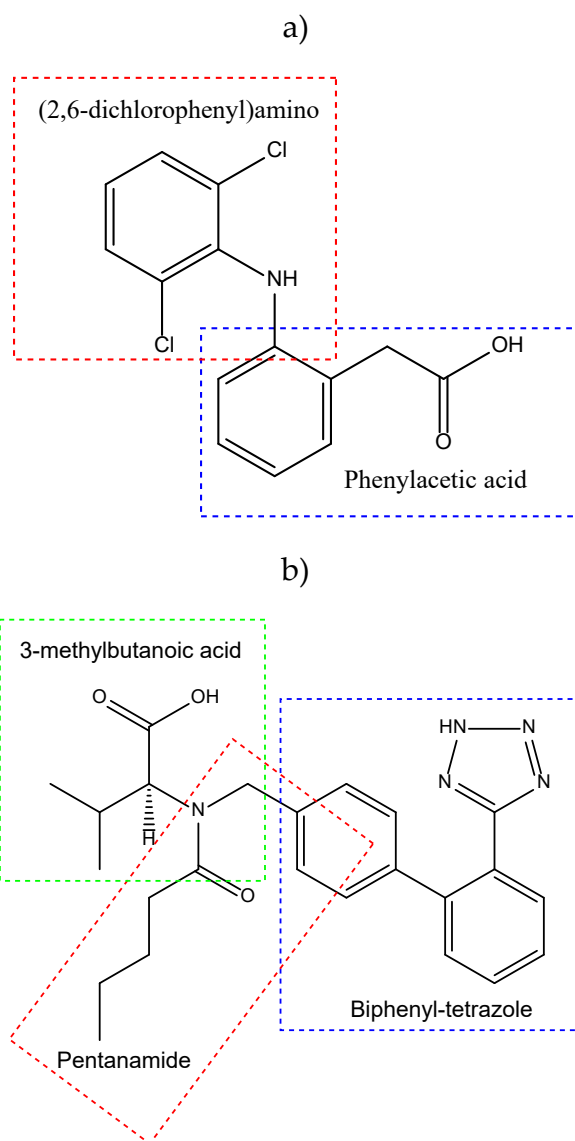

**Figure S1.** Chemical structure (a) Diclofenac, and (b) Valsartan.

a) Diclofenac

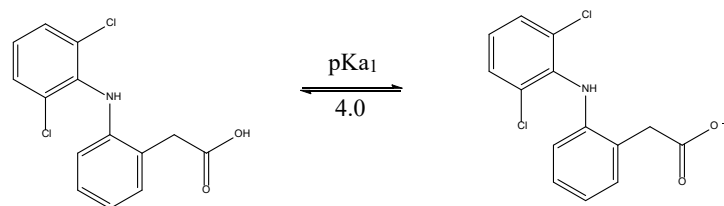

b) Valsartan

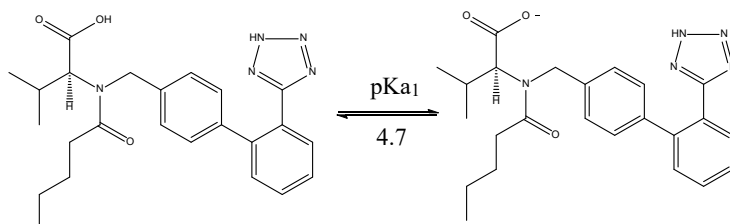

**Figure S2.** Structures of (a) Diclofenac and (b) Valsartan, according to their pKa values.

**Table S1.** Characteristics of the pharmaceuticals.

| Molecular structure                                                                                            | Molecular weight (g mol <sup>-1</sup> ) | UV/Vis absorbance spectrum                                                           | pKa                                                                                             | log Kow |
|----------------------------------------------------------------------------------------------------------------|-----------------------------------------|--------------------------------------------------------------------------------------|-------------------------------------------------------------------------------------------------|---------|
| <chem>C14H11Cl2NO2</chem><br>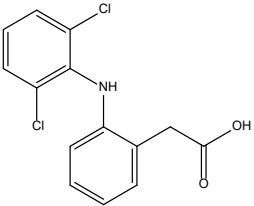 | 296.148                                 |    | pKa <sub>1</sub> = 4.0<br>(carboxylic acid) [S1].                                               | 4.51    |
| <chem>C24H29N5O3</chem><br> | 435.52                                  |  | pKa <sub>1</sub> = 3.9<br>(tetrazole ring)<br>pKa <sub>2</sub> = 4.7<br>(carboxylic acid) [S2]. | 4.00    |

According to the World Health Organization, the prescription and consumption of antihypertensives will increase, because the number of adults with hypertension worldwide by 2025 could reach a total of 1.56 billion [S3]. Valsartan (VAL) is a pharmaceutical commonly used as an antihypertensive [S4] and it can be detected in wastewater. On the other hand, diclofenac (DCF) is a commonly used non-steroidal anti-inflammatory drug. Consequently, DFC has been detected in the surface, ground, and even drinking water [S5, S6]. Furthermore, DCF can affect rates of physiological growth and reproduction of phytoplankton [S7].

## Supplementary references

- S1. Lara-Pérez, C.; Leyva, E.; Zermeño, B.; Osorio, I.; Montalvo, C.; Moctezuma, E. Photocatalytic degradation of diclofenac sodium salt: adsorption and reaction kinetic studies. *Environ. Earth Sci.* **2020**, *79*, 1–13, doi:10.1007/s12665-020-09017-z.
- S2. Siddiqui, N.; Husain, A.; Chaudhry, L.; Alam, S.S.; Mitra, M.; Bhasin, P.S. Pharmacological and pharmaceutical profile of valsartan: A review. *J. Appl. Pharm. Sci.* **2011**, *1*, 12–19.
- S3. Kearney, P.M.; Whelton, M.; Reynolds, K.; Muntner, P.; Whelton, P.K.; He, J. Global burden of hypertension: analysis of worldwide data. *Lancet* **2005**, *365*, 217–223, doi:10.1016/s0140-6736(05)17741-1.
- S4. Arvaniti, O.S.; Bairamis, F.; Konstantinou, I.; Mantzavinos, D.; Frontistis, Z. Degradation of antihypertensive drug valsartan in water matrices by heat and heat/ultrasound activated persulfate: Kinetics, synergy effect and transformation products. *Chem. Eng. J. Adv.* **2020**, *4*, 100062, doi:10.1016/j.cej.2020.100062.
- S5. Nackiewicz, J.; Gąsowska-Bajger, B.; Kołodziej, Ł.; Poliwoda, A.; Pogoda-Mieszczak, K.; Skonieczna, M. Comparison of the degradation mechanisms of diclofenac in the presence of iron octacarboxyphthalocyanine and myeloperoxidase. *Spectrochim. Acta - Part A Mol. Biomol. Spectrosc.* **2023**, *287*, doi:10.1016/j.saa.2022.122113.
- S6. Shamsudin, M.S.; Azha, S.F.; Ismail, S. A review of diclofenac occurrences, toxicology, and potential adsorption of clay-based materials with surfactant modifier. *J. Environ. Chem. Eng.* **2022**, *10*, 107541, doi:10.1016/j.jece.2022.107541.
- S7. Vasantha Raman, N.; Gsell, A.S.; Voulgarellis, T.; van den Brink, N.W.; de Senerpont Domis, L.N. Moving beyond standard toxicological metrics: The effect of diclofenac on planktonic host-parasite interactions. *Aquat. Toxicol.* **2023**, *254*, 106370, doi:10.1016/j.aquatox.2022.106370.
